# Supplementary material
Source: publisher figshare collection journal article supplement (https://gsajournals.figshare.com/ndownloader/files/12996929)
Supplement: Supplementary file 1 [file 12996929]

Bioinformatics pipeline for G3_2018_200625 manuscript

Title: The role of standing variation in the evolution of weediness traits in South Asian weedy rice (*Oryza Spp.*)

Authors: Zhongyun Huang, Shannon Kelly, Rika Matsuo, Lin-Feng Li, Yaling Li, Kenneth M Olsen, Yulin Jia, Ana Caicedo

1. FastQC plot 🡪 trim fastq [bwa] 🡪 sai [samtools] 🡪 sam 🡪 filter uniq (XT:A:U and XT:A:M) [samtools] 🡪 sort_bam [merge_bam.pl] 🡪 merge bam [Multi_sam2.pl sam2.pl] 🡪 VCF
2. Filter VCF by depth and quality (vcf.pl) 🡪 filter.vcf [merge_snp.pl] 🡪 merge_snp.txt [Splice.pl] 🡪 temporary individuals [multi_replace.pl and replace.pl] 🡪 temporary individuals [merge_replace.pl] 🡪 merge_unmap.txt (all samples SNP matrix)
3. Merge_unmap.txt + group4.txt [chname.pl] 🡪 merge_group_unmap_snp.txt

### group4.txt equal to sureselect_group_2016.xlsx ###

1. Merge_group_unmap_snp.txt + select_cover_region_for_select_snp.txt [select_gene_snp.pl] 🡪 region_snp.txt [split_group.pl] 🡪 *.group [count_new3.pl] 🡪 *.new_group
2. region_snp.txt [group_sample_new.pl] 🡪 group_sample_new.txt
3. Input: msu6.fa, cds_sort.gff, cds_over_fragment.txt <130 region>

Script: trans_non_length.pl

Output: cds_syn.txt

1. Input: *.new.group, cds_syn.txt, gene_region.*.txt

Script: trans_group_p.pl

Output: group_p.txt

1. Input: *.new.group, msu6.fa, cds.sort.gff

Script: trans_non_new.pl

Output: *.new.syn/nonsyn/silent.group

1. *.new.group + *.new.syn/nonsyn/silent.group + header.txt [watterson3_count.pl] 🡪 *watterson3.count [merge_count.pl] 🡪 merge_count.txt
2. Theta

Input: group_p.txt, header.txt, *.syn/nonsyn/silent.group, *.new.group, new_cover_region.txt

Script: watterson3_gene_new.pl and merge_watterson.pl

Output: *.new.total/syn/silent/nonsyn.theta.txt 🡪 merge.fra.theta

1. Pi

Input: group_p.txt, header.txt, *.syn/nonsyn/silent.group, *.new.group, new_cover_region.txt

Script: pi_gene_nei_1987_new_win.pl and merge_pi.pl

Output: *.new.total/syn/silent/nonsyn.nei1987_pi.txt 🡪 merge.fra.pi

1. FST

Input: group_p.txt, header.txt, new_cover_region.txt

Script: multi_fst.pl and fst_gene_hudson1992.p and fst_total_second_new.pl

Output: Hudson_fst and second_fst

1. Tajima’s D

Input: group_sample_new.txt, merge_count.txt, group_p.txt, merge_fra.pi

Script: d_final.pl

Output: Tajima’s D
